# Is the basic reproduction number for the covid-19 epidemic estimated by the SIR model reliable?

Hyun Mo Yang<sup>a\*</sup>, Luis Pedro Lombardi Junior<sup>b</sup>,  
Ariana Campos Yang<sup>c</sup>

<sup>a,b</sup>Department of Applied Mathematics, State University of Campinas  
Praça Sérgio Buarque de Holanda, 651; CEP: 13083-859,  
Campinas, SP, Brazil

<sup>c</sup>Division of Allergy and Immunology,  
General Hospital of the Medicine School of University of São Paulo  
Av. Dr. Eneas Carvalho de Aguiar, 255; CEP: 05403-000,  
São Paulo, SP, Brazil

emails: <sup>a</sup>hyunyang@ime.unicamp.br, <sup>b</sup>luispedro\_jr@hotmail.com,  
<sup>c</sup>arianacy@gmail.com

## Abstract

The transmission of severe acute respiratory syndrome coronavirus 2 (SARS-CoV-2) becomes pandemic but presents different patterns in the world. To describe the epidemic of coronavirus disease 2019 (covid-19) in each country or region, mathematical models were formulated aiming the estimation of the basic reproduction number  $R_0$ . The simplest mathematical model, the SIR model, provided a lower estimation for  $R_0$ , ranging from 1.5

---

\*Corresponding author: tel. + 55 19 3521-6031

to 3.0. However, more elaborate models, taking into account the natural history of covid-19, must be used to obtain a more reliable estimation of  $R_0$ . One of the elaborated models presented here estimated a higher value for  $R_0$ , that is, 6.54 and 5.88 for, respectively, São Paulo State (Brazil) and Spain. It is worth stressing that this model assumed that severe covid-19 cases were not participating in the SARS-CoV-2 transmission chain, which can not be assumed in the SIR model.

**Keywords:** mathematical model; SEAPMDR model; SARS-CoV-2 transmission; estimation; covid-19 epidemic

## 1 Introduction

The epidemic of coronavirus disease 2019 (covid-19) caused by the severe acute respiratory syndrome coronavirus 2 (SARS-CoV-2) was first detected in China in December 2019, and, in March 2020, covid-19 was declared a pandemic by WHO. At the beginning of the epidemic, and also during the first months, we have two sets of covid-19 data: Severe covid-19 cases (those in hospitals, where they were tested and confirmed), and deaths due to covid-19. Mathematical models were formulated and used to fit the epidemic curve to estimate the basic reproduction number  $R_0$ .

In the literature, the usually assumed basic reproduction number  $R_0$  is around 2.5, see for instance [1] and [2]. Li *et al.* [10] based on the SIR model and using data from January 10 to February 8, 2020, they explicitly cited that they estimated the effective reproduction number  $R_{ef}$  instead of  $R_0$ , arguing that the most recent common ancestor could have occurred on November 17, 2019. The time elapsed from November 17, 2019 (the first case) to January 10, 2020 (the first day in the estimation) is 54 days. However, on January 23, 2020, Wuhan and other cities of Hubei province imposed a rigid lockdown. Therefore, they estimated  $R_{ef}$  by taking into account the range of data recorded 54 days after the onset of the epidemic, and 16 days after the lockdown.

The reliable estimation of  $R_0$  is important because this number determines the magnitude of effort to eradicate infection. For instance, the efforts of vaccination to eradicate an infection must be vaccinating a fraction equal or greater than  $1 - 1/R_0$  of susceptibles [3]. Instead of vaccination, if we consider the isolation of susceptible individuals, for a lower value of  $R_0$ , a small fraction of the population must be in lockdown ( $1 - 1/R_0$ ) to control the transmission of

SRS-CoV-2. In [4], analyzing vaccination as a control mechanism, if  $R_{ef}$  is reduced lower than one, the number of cases decreased following an exponential-type decay.

The estimation of the basic reproduction number  $R_0$ , however, depends on the mathematical model. We consider two examples. The first model is the simplest susceptible - infectious - recovered (SIR) model, and the second is a model taking into account more aspects of the natural history of covid-19 infection encompassing the lethality rate depending on the age. This second model is structured in two subpopulations and considers, besides S and R compartments, the compartments of exposed (E), asymptomatic (A), pre-diseased or pre-symptomatic (P), mild (M) and severe (D) covid-19, called the SEAPMDR model. These models are fitted taking into account the severe covid-19 data collections from São Paulo State (Brazil) [6] and Spain [7].

The estimation of  $R_0$  is based on the severe covid-19 data restricted to the period when there are not any kind of interventions. This period is in concordance with the definition of the basic reproduction number: One infectious individual is introduced in a completely susceptible population without constraints (interventions) [3].

## 2 Material and methods

We present the SIR and SEAPMDR models. From both models, we obtained  $R_0$  from the steady-state analysis.

### 2.1 The SIR model

In the SIR model, the dynamical system is

$$\begin{cases} \frac{d}{dt}S &= \phi N - \beta \frac{I}{N}S - \mu S \\ \frac{d}{dt}I &= \beta \frac{I}{N}S - (\gamma + \mu + \alpha) I \\ \frac{d}{dt}R &= \gamma I - \mu R, \end{cases} \quad (1)$$

where the total population  $N = S + I + R$  obeys

$$\frac{d}{dt}N = \phi N - \mu N - \alpha I. \quad (2)$$

The parameters  $\phi$  and  $\mu$  are, respectively, the birth and natural mortality rates,  $\beta$ ,  $\gamma$ , and  $\alpha$  are, respectively, the transmission rate, the infectious rate, and the additional mortality (lethality) rate. If  $\phi = \mu + \alpha I/N$ , then  $N$  is constant.

In Appendix A, the steady-state of a system of equations in terms of fractions corresponding to equation (1) was analyzed to obtain the basic reproduction number  $R_0$ . For simplicity, let us consider  $\phi = \mu$ . The system of equations (1), using  $R = N - I - S$ , can be rewritten as

$$\begin{cases} \frac{d}{dt}S &= \mu N - \beta \frac{I}{N}S - \mu S \\ \frac{d}{dt}I &= (\gamma + \mu + \alpha)(R_{ef} - 1)I \end{cases} \quad (3)$$

where the effective reproduction number  $R_{ef}$  is defined by

$$R_{ef} = R_0 \frac{S}{N}, \quad (4)$$

with the basic reproduction number  $R_0$  being given by equation (A.2) in Appendix A changing  $\phi$  by  $\mu$ , that is,  $R_0 = \beta/(\gamma + \mu + \alpha)$ .

Let us analyze the system of equations (3) at two boundaries. Let us assume that the first case of covid-19 is introduced at  $t = 0$ , that is, the initial conditions supplied to equation (3) are  $S(0) = N - 1$  and  $I(0) = 1$ . For a large population, we can approximate  $S \sim N$  and the system of equations can be approximated by

$$\begin{cases} \frac{d}{dt}S &\sim -\beta I \\ \frac{d}{dt}I &\sim (\gamma + \mu + \alpha)(R_0 - 1)I, \end{cases}$$

with  $R = N - S - I$ , and at the beginning of the epidemic, if we estimate the transmission rate  $\beta$ , we can calculate  $R_0$  using the expression obtained from the steady-state analysis. The system of equations (3) does not approach to a steady-state, but attains it when  $\alpha = 0$ . In this case, asymptotically ( $t \rightarrow \infty$ ), we have  $dI/dt = 0$  if  $R_{ef} = R_0 S/N = 1$ , that is,  $S \rightarrow S^* = s^* N$  and  $I \rightarrow I^* = i^* N$ , where  $i^*$  and  $s^*$  are given by equations (A.6) and (A.7), respectively. Hence, when  $\alpha = 0$ , at  $t = 0$ ,  $R_{ef} = R_0$ , and when  $t \rightarrow \infty$  (steady-state),  $R_{ef} = 1$  (see equation (A.7)), from which we retrieve the well known relationship  $s^* = 1/R_0$  [3].

Therefore, based on  $R_{ef}$  given by equation (4) when  $\phi = \mu$  and  $\alpha = 0$ , the basic reproduction number  $R_0$  obtained from mathematical modelings provides two useful information: At the beginning of the epidemic ( $t = 0$ ),  $R_0$  gives the magnitude of the initial takeoff of the epidemic, and when epidemic reaches the steady-state (after many waves of the epidemic, that is,  $t \rightarrow \infty$ ),  $R_0$  measures its severity providing the fraction of susceptible individuals, that is,  $s^* = 1/R_0$ . Between these two extremes, the effective reproduction number  $R_{ef}$  dictates the course of an epidemic, which follows decaying oscillations around  $R_{ef} = 1$  [4]. It is worth stressing that  $R_{ef}$  given by equation (4) is valid only when  $\phi = \mu$  and  $\alpha = 0$ , and when one of these conditions is

not valid,  $R_{ef}$  given by equation (4) can be used as an approximated value.

The number of accumulated severe covid-19 cases  $\Omega$  is given by the exit from  $S$ , and entering into classes  $I$ , that is,

$$\frac{d}{dt}\Omega = \beta \frac{I}{N} S, \quad \text{with } \Omega(0) = 0, \quad (5)$$

and this equation is accoped to the system of equations (1) to obtain numerically  $\Omega$ .

## 2.2 The SEAPMDR model

One of the main aspects of covid-19 is increased lethality in elder individuals. For this reason, a population is divided into two groups, composed of young (60 years old or less, denoted by subscript  $y$ ), and elder (60 years old or more, denoted by subscript  $o$ ) individuals. The vital dynamic of this community is described by the per-capita rates of birth ( $\phi$ ) and mortality ( $\mu$ ), and  $\varphi$  is the aging rate, that is, the flow from young subpopulation  $y$  to elder subpopulation  $o$ . Another aspect is the presence of the presymptomatic individuals, that is, individuals without symptoms transmitting SARS-CoV-2 before the onset of the disease [5].

Since we are dealing with the initial phase of the epidemic, the model does not consider the compartments related to quarantine and mass testing. Hence, for each subpopulation  $j$  ( $j = y, o$ ), individuals are divided into six classes: susceptible  $S_j$ , exposed and incubating  $E_j$ , asymptomatic  $A_j$ , symptomatic individuals in the initial phase of covid-19 (or pre-diseased)  $P_j$ , and symptomatic individuals with severe covid-19  $D_j$ , mild covid-19  $M_j$ . However, all young and elder individuals in classes  $A_j$ ,  $M_j$ , and  $D_j$  enter into the same recovered class  $R$  (this is the 7<sup>th</sup> class, but common to both subpopulations). Hence, the SEAPMDR model has 13 compartments.

The natural history of covid-19 is the same for young ( $j = y$ ) and elder ( $j = o$ ) subpopulations. We assume that individuals in the asymptomatic ( $A_j$ ), pre-diseased ( $P_j$ ), and a fraction  $z_j$  of mild covid-19 ( $M_j$ ) classes are transmitting the virus, and other infected classes ( $(1 - z_j) M_j$  and  $D_j$ ) are under voluntary or forced isolation. Susceptible individuals are infected according to  $\lambda_j S_j$  (known as the mass action law [3]), where  $\lambda_j$  is the per-capita incidence rate (or force of infection) defined by  $\lambda_j = \lambda (\delta_{jy} + \psi \delta_{jo})$ , with  $\lambda$  being

$$\lambda = \frac{1}{N} (\beta_{1y} A_y + \beta_{2y} P_y + \beta_{3y} z_y M_y + \beta_{1o} A_o + \beta_{2o} P_o + \beta_{3o} z_o M_o), \quad (6)$$

where  $\delta_{ij}$  is Kronecker delta, with  $\delta_{ij} = 1$  if  $i = j$ , and 0, if  $i \neq j$ ; and  $\beta_{1j}$ ,  $\beta_{2j}$  and  $\beta_{3j}$  are the transmission rates, that is, the rates at which a virus encounters a susceptible people and infects him/her. In [8], a particular model was analyzed letting  $z_y = z_o = 0$  and  $\chi_y = \chi_o = 1$ ,

that is, the force of infection defined by

$$\lambda = \frac{1}{N} (\beta_{1y}A_y + \beta_{2y}P_y + \beta_{1o}A_o + \beta_{2o}P_o).$$

Susceptible individuals are infected at a rate  $\lambda_j$  and enter into class  $E_j$ . After an average period  $1/\sigma_j$  in class  $E_j$ , where  $\sigma_j$  is the incubation rate, exposed individuals enter into the asymptomatic class  $A_j$  (with probability  $l_j$ ) or pre-diseased class  $P_j$  (with probability  $1 - l_j$ ). After an average period  $1/\gamma_j$  in class  $A_j$ , where  $\gamma_j$  is the recovery rate of asymptomatic individuals, asymptomatic individuals acquire immunity (recovered) and enter into recovered class  $R$ . Possibly asymptomatic individuals can manifest symptoms at the end of this period, and a fraction  $1 - \chi_j$  enters into mild covid-19 class  $M_j$ . For symptomatic individuals, after an average period  $1/\gamma_{1j}$  in class  $P_j$ , where  $\gamma_{1j}$  is the infection rate of pre-diseased individuals, pre-diseased individuals enter into severe covid-19 class  $D_j$  (with probability  $1 - k_j$ ) or mild covid-19 class  $M_j$  (with probability  $k_j$ ). Individuals in class  $D_j$  acquire immunity after period  $1/\gamma_{2j}$ , where  $\gamma_{2j}$  is the recovery rate of severe covid-19, and enter into recovered class  $R$  or die under the disease-induced (additional) mortality rate  $\alpha_j$ . Individuals in mild covid-19 class  $M_j$  acquire immunity after period  $1/\gamma_{3j}$ , where  $\gamma_{3j}$  is the recovery rate of mild covid-19, and enter into recovered class  $R$ .

The SARS-CoV-2 transmission model is described by the system of ordinary differential equations, with  $j = y, o$ . Equations for susceptible individuals are

$$\begin{cases} \frac{d}{dt}S_y &= \phi N - (\varphi + \mu)S_y - \lambda S_y \\ \frac{d}{dt}S_o &= \varphi S_y - \mu S_o - \lambda \psi S_o, \end{cases} \quad (7)$$

for infectious individuals,

$$\begin{cases} \frac{d}{dt}E_j &= \lambda (\delta_{jy} + \psi \delta_{jo}) S_j - (\sigma_j + \mu) E_j \\ \frac{d}{dt}A_j &= l_j \sigma_j E_j - (\gamma_j + \mu) A_j \\ \frac{d}{dt}P_j &= (1 - l_j) \sigma_j E_j - (\gamma_{1j} + \mu) P_j \\ \frac{d}{dt}M_j &= (1 - \chi_j) \gamma_j A_j + k_j \gamma_{1j} P_j - (\gamma_{3j} + \mu) M_j \\ \frac{d}{dt}D_j &= (1 - k_j) \gamma_{1j} P_j - (\gamma_{2j} + \mu + \alpha_j) D_j, \end{cases} \quad (8)$$

and for recovered individuals,

$$\frac{d}{dt}R = \chi_y \gamma_y A_y + \gamma_{3y} M_y + \gamma_{2y} D_y + \chi_o \gamma_o A_o + \gamma_{3o} M_o + \gamma_{2o} D_o - \mu R, \quad (9)$$

where  $N_j = S_j + E_j + A_j + P_j + M_j + D_j$ , and  $N = N_y + N_o + I$  obeys

$$\frac{d}{dt}N = (\phi - \mu) N - \alpha_y D_y - \alpha_o D_o, \quad (10)$$

with the initial number of population at  $t = 0$  being  $N(0) = N_0 = N_{0y} + N_{0o}$ , where  $N_{0y}$  and  $N_{0o}$  are the size of young and elder subpopulations at  $t = 0$ .

The number of accumulated severe covid-19 cases  $\Omega$  is obtained from

$$\frac{d}{dt}\Omega = (1 - k_y) \gamma_{1y} P_y + (1 - k_o) \gamma_{1o} P_o, \quad \text{with } \Omega(0) = 0, \quad (11)$$

which are the exit from class  $P$ , and entering into class  $D$ .

Table 2 summarizes the model parameters. The description of the assigned values can be found in [8]. The transmission rates are estimated.

Table 1: Summary of the model parameters ( $j = y, o$ ) and values (rates in  $days^{-1}$ , and proportions are dimensionless). The values (\*) correspond to São Paulo State. For Spain,  $\phi = \mu = 1/(83.4 \times 365) days^{-1}$ ,  $\varphi = 1.14 \times 10^{-5} days^{-1}$ , and  $\psi = 1.1$ .

| Symbol                      | Meaning                                                | Value                 |
|-----------------------------|--------------------------------------------------------|-----------------------|
| $\mu^*$                     | Natural mortality rate                                 | $1/(78.4 \times 365)$ |
| $\phi^*$                    | Birth rate                                             | $1/(78.4 \times 365)$ |
| $\varphi^*$                 | Aging rate                                             | $6.7 \times 10^{-6}$  |
| $\sigma_y (\sigma_o)$       | Incubation rate                                        | $1/5 (1/5)$           |
| $\gamma_y (\gamma_o)$       | Recovery rate of asymptomatic individuals              | $1/10 (1/11)$         |
| $\gamma_{1y} (\gamma_{1o})$ | Infection rate of pre-diseased individuals             | $1/4 (1/4)$           |
| $\gamma_{2y} (\gamma_{2o})$ | Recovery rate of severe covid-19                       | $1/10 (1/14)$         |
| $\gamma_{3y} (\gamma_{3o})$ | Infection rate of mild covid-19 individuals            | $1/10 (1/11)$         |
| $\alpha_y (\alpha_o)$       | Additional mortality rate                              | $0.0018 (0.009)$      |
| $z_y (z_o)$                 | Proportion circulating of mild covid-19 individuals    | $0.5 (0.2)$           |
| $\psi^*$                    | Scaling factor of transmission among elder individuals | $1.15$                |
| $\chi_y (\chi_o)$           | Proportion of remaining as asymptomatic individuals    | $0.98 (0.95)$         |
| $l_y (l_o)$                 | Proportion of asymptomatic individuals                 | $0.8 (0.75)$          |
| $k_y (k_o)$                 | Proportion of mild (non-hospitalized) covid-19         | $0.8 (0.75)$          |

In Appendix B, the steady-state of a system of equations in terms of fractions corresponding to equations (7), (8) and (9) was analyzed to obtain the basic reproduction number  $R_0$ . The

basic reproduction number  $R_0$  given by equation (B.8) in Appendix B, with the fractions written as  $s_y^0 = N_{0y}/N$  and  $s_o^0 = N_{0o}/N$ , is

$$R_0 = (R_{1y} + R_{2y}) \frac{N_{0y}}{N_0} + (R_{1o} + R_{2o}) \frac{N_{0o}}{N_0}, \quad (12)$$

where  $N_{0y}$  and  $N_{0o}$  are the initial numbers of young and elder subpopulations with  $N_0 = N_{0y} + N_{0o}$ , and

$$\begin{cases} R_{1y} = l_y \frac{\sigma_y}{\sigma_y + \phi} \frac{\beta_{1y}}{\gamma_y + \phi} + (1 - l_y) \frac{\sigma_y}{\sigma_y + \phi} \frac{\beta_{2y}}{\gamma_{1y} + \phi} \\ R_{1o} = l_o \frac{\sigma_o}{\sigma_o + \phi} \frac{\beta_{1o}\psi}{\gamma_o + \phi} + (1 - l_o) \frac{\sigma_o}{\sigma_o + \phi} \frac{\beta_{2o}\psi}{\gamma_{1o} + \phi} \\ R_{2y} = \left[ l_y \frac{\sigma_y}{\sigma_y + \phi} (1 - \chi_y) \frac{\gamma_y}{\gamma_y + \phi} + (1 - l_y) \frac{\sigma_y}{\sigma_y + \phi} k_y \frac{\gamma_{1y}}{\gamma_{1y} + \phi} \right] \frac{z_y \beta_{3y}}{\gamma_{3y} + \phi} \\ R_{2o} = \left[ l_o \frac{\sigma_o}{\sigma_o + \phi} (1 - \chi_o) \frac{\gamma_o}{\gamma_o + \phi} + (1 - l_o) \frac{\sigma_o}{\sigma_o + \phi} k_o \frac{\gamma_{1o}}{\gamma_{1o} + \phi} \right] \frac{z_o \beta_{3o}\psi}{\gamma_{3o} + \phi}. \end{cases} \quad (13)$$

Letting  $z_y = z_o = 0$  ( $R_{2y} = R_{2o} = 0$ ), we retrieve the basic reproduction number obtained in [8].

### 3 Results

The basic reproduction number  $R_0$  is estimated considering the models presented in the foregoing section. We estimate  $R_0$  for São Paulo State (Brazil) and Spain.

São Paulo State has 44.6 million inhabitants (demographic density,  $177/km^2$ ) with 15.3% of the population comprised of elder individuals. The first case was registered on February 26, and partial quarantine was implemented on March 24. Considering that there is a delay of around 9 days since the infection and the onset of covid-19, we estimate the basic reproduction number considering collected data from February 26 to April 2.

Spain has 47.4 million inhabitants (demographic density,  $92.3/km^2$ ) with 25.8% of the population comprised of elder individuals. The first case was registered on January 31, and the lockdown was implemented on March 16. Considering a delay of around 9 days, we estimate the basic reproduction number considering collected data from January 31 to March 25.

To evaluate the parameter  $\beta$ , we calculate

$$\text{Sum} = \sum_{i=1}^n \omega_i [\Omega(\beta, t_i) - \Omega^{ob}(t_i)]^2, \quad (14)$$



where  $\Omega(\beta, t_i)$  is the accumulated severe covid-19 cases calculated from the dynamical system, and  $\Omega^{ob}(t_i)$  is the accumulated severe covid-19 registered cases at day  $t_i$ , that is,

$$\Omega^{ob}(t_i) = \sum_{j=1}^i \Omega_d^{ob}(t_j),$$

where  $\Omega_d^{ob}(t_j)$  is the severe covid-19 cases registered at day  $t_j$ . We consider the same weight for all data, that is, we let  $\omega_i = 1$ . The value of  $\beta$  that minimizes Sum is the fitted value.

### 3.1 The SIR model

To estimate the transmission rate, we use equation (14) and  $\Omega$  given by equation (5). The model parameters are  $\gamma = 1/10$ ,  $\alpha = 0.002$ , and, for São Paulo State,  $\phi = \mu = 1/(78.4 \times 365)$  and, for Spain,  $\phi = \mu = 1/(83.4 \times 365)$  (all in *days*<sup>-1</sup>). The transmission rate  $\beta$  is estimated and the basic reproduction number  $R_0$  is calculated using equation (A.2). We estimate the basic reproduction number using equation (1) with different infective individuals at  $t = 0$ .

For the data collected from São Paulo State, we obtained for  $I(0) = 1$ ,  $R_0 = 3.14$  with Sum =  $8.02 \times 10^5$ , for  $I(0) = 10$ ,  $R_0 = 2.4$  with Sum =  $8.49 \times 10^5$ , for  $I(0) = 25$ ,  $R_0 = 2.11$  with Sum =  $1.86 \times 10^6$ , and for  $I(0) = 100$ ,  $R_0 = 1.62$  with Sum =  $5.87 \times 10^6$ . Other initial conditions are  $S(0) = 44.6$  million and  $R(0) = 0$ . The lowest Sum occurs when  $R_0 = 3.14$ .

For the data collected from Spain, we obtained for  $I(0) = 1$ ,  $R_0 = 2.97$  with Sum =  $4.16 \times 10^8$ , for  $I(0) = 10$ ,  $R_0 = 2.5$  with Sum =  $6.32 \times 10^8$ , for  $I(0) = 25$ ,  $R_0 = 2.3$  with Sum =  $1.13 \times 10^9$ , and for  $I(0) = 100$ ,  $R_0 = 2.06$  with Sum =  $1.19 \times 10^9$ . Other initial conditions are  $S(0) = 47.4$  million and  $R(0) = 0$ . The lowest Sum occurs when  $R_0 = 2.97$ .

Figure 1 shows the estimated curve  $\Omega$  for São Paulo (a) and Spain (b) with three different initial conditions ( $I(0) = 1, 10$ , and  $25$ ).

We observed that the larger the value of  $I(0)$ , the smaller is the estimated  $R_0$ . By the stringent definition of  $R_0$ , we must consider  $I(0) = 1$ . However, the initial condition  $I(0) > 1$  mimics the first case of covid-19 occurring earlier than the time  $t = 0$ . The Singapore University of Technology and Design [9] estimated  $R_0$  using  $I(0) = 100$  for different countries.

### 3.2 The SEAPMDR model

To estimate the transmission rates, we consider  $\beta_y = \beta_{1y} = \beta_{2y} = \beta_{3y}$  and  $\beta_o = \beta_{1o} = \beta_{2o} = \beta_{3o} = \psi\beta_y$ , and we use equation (14) and  $\Omega$  given by equation (11). The values for the model parameters are those given in Table 1. The basic reproduction number  $R_0$  is calculated using

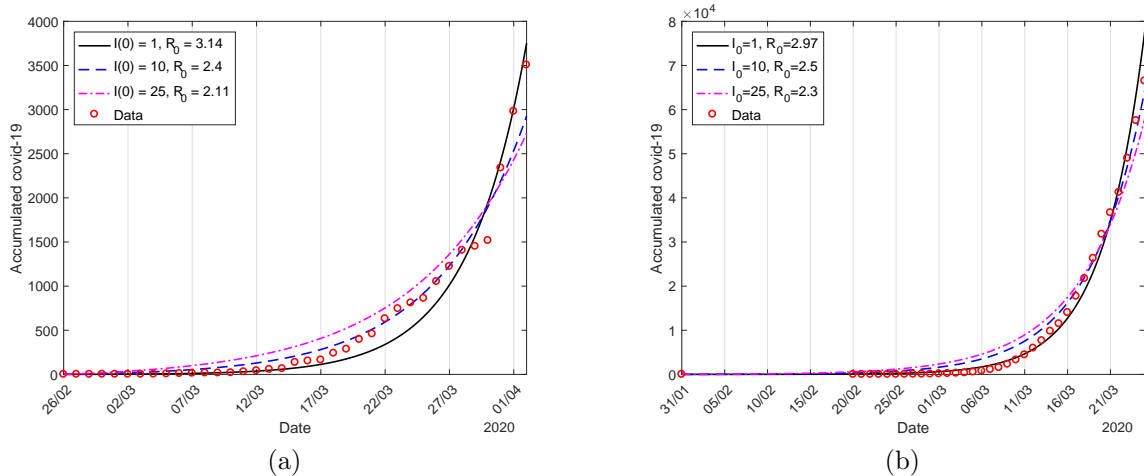

Figure 1: The estimated curve  $\Omega$  for São Paulo (a) and Spain (b) with three different initial conditions  $I(0) = 1$  (continuous curve), 10 (dashed curve), and 25 (dashed and dotted curve).

equation (12).

The initial conditions supplied to the system of equations (7), (8) and (9) are, for young and elder subpopulations,

$$\left\{ \begin{array}{l} \text{young} \left( S_y(0) = N_{0y}, \quad E_y(0) = 30, \quad A_y(0) = 24, \quad P_y(0) = 6, \quad M_y(0) = 6, \quad D_y(0) = 0 \right) \\ \text{and} \\ \text{elder} \left( S_o(0) = N_{0o}, \quad E_o(0) = 20, \quad A_o(0) = 16, \quad P_o(0) = 4, \quad M_o(0) = 3, \quad D_o(0) = 1, \right) \end{array} \right. \quad (15)$$

plus  $R(0) = 0$ , where the initial simulation time  $t = 0$  corresponds to the calendar time when the first case was confirmed (February 26 for São Paulo State, and January 31 for Spain). For São Paulo State,  $N_{0y} = 37.8$  million and  $N_{0o} = 6.8$  million, and for Spain,  $N_{0y} = 35.17$  million and  $N_{0o} = 12.23$  million.

For the data collected from São Paulo State, we obtained  $R_0 = 6.54$ , with  $\text{Sum} = 7.75 \times 10^5$ , while for the data collected from Spain, we obtained  $R_0 = 5.88$ , with  $\text{Sum} = 1.1 \times 10^8$ . Figure 2 shows the estimated curve  $\Omega$  for São Paulo State (a) and Spain (b).

If we let  $z_y = z_o = 0$  (mild covid-19 cases do not transmit) and  $\chi_y = \chi_o = 1$  (asymptomatic individuals do not relapse to mild covid-19), the estimated basic reproduction number is  $R_0 = 6.26$  for São Paulo State, with  $\text{Sum} = 7.56 \times 10^5$ , and  $R_0 = 5.67$  for Spain, with  $\text{Sum} = 1.18 \times 10^8$ .

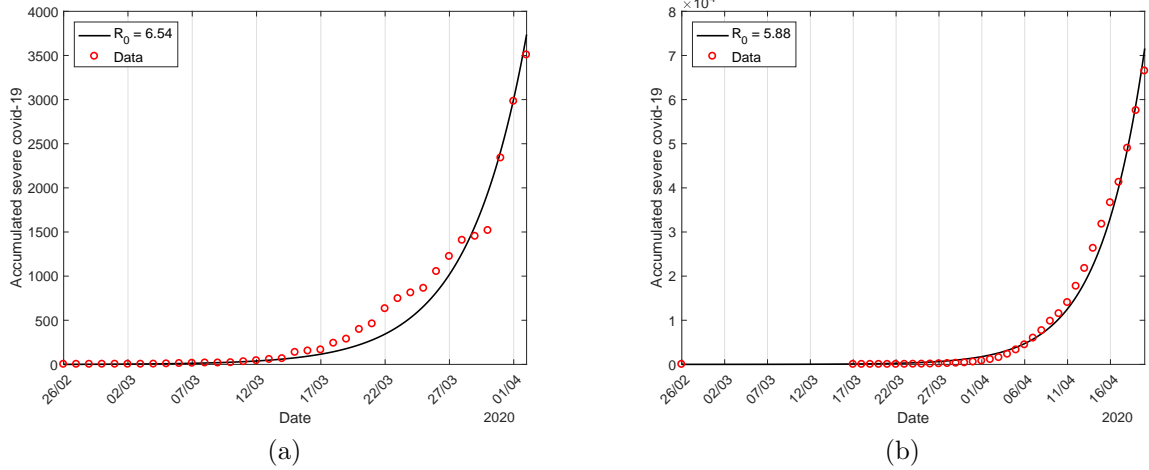

Figure 2: The estimated curve  $\Omega$  and the observed accumulated cases for São Paulo State (a) and Spain (b).

## 4 Discussion and conclusion

There are different manners to define an epidemic curve. For instance, one possible definition is the curve formed by those positive for serological and PCR tests. However, in the early phase of the epidemic, the covid-19 epidemic curve must be defined by severe cases, which are the only available data. In the SEAPMDR model, the covid-19 epidemic curve was retrieved by estimating the transmission rates of asymptomatic, pre-diseased, and a fraction of mild classes. The estimated basic reproduction number was higher than that usually accepted ( $R_0$  approximately 3 using the SIR model):  $R_0 = 6.54$  for São Paulo State, and  $R_0 = 5.88$  for Spain. In [8], it was shown that the ratio between non-apparent and apparent covid-19 is around 24, showing that SARS-CoV-2 is being transmitted by a huge number of hidden cases.

In the SEAPMDR model, the initial conditions  $E(0) = 50$  and  $I(0) = 1$  were supplied to the dynamical system, resulting in  $R_0 = 6.54$  (São Paulo State) and  $R_0 = 5.88$  (Spain). Instead of comparing with the SIR model, let us compare with the SEIR model considering the same initial conditions  $E(0) = 50$  and  $I(0) = 1$  supplied to the elaborated model (see Appendix C). The estimated basic reproduction number for São Paulo State was  $R_0 = 3.92$ , and for Spain,  $R_0 = 4.41$ .

Comparing SIR, SEIR, and SEAPMDR models, as the model incorporates more aspects of the natural history of the infection, higher becomes the estimation of  $R_0$ . For the SIR and SEIR models, there is not any alternative except considering severe covid-19 cases as infective. However, in the SEAPMDR model, the asymptomatic ( $A$ ), pre-diseased ( $D_1$ ) and a fraction

of mild covid-19 ( $Q_2$ ) individuals are transmitting SARS-CoV-2, but the severe covid-19 ( $D_2$ ) individuals are isolated and do not contribute, except to infect the hospital staff [8].

The curve of accumulated covid-19 cases  $\Omega$  obtained from equation (11) is a sigmoid-shape, that is, presents a quick increase during the first phase ( $R_{ef} > 1$ , with upward concavity) followed by a slow increase ( $R_{ef} < 1$ , with downward concavity). For this reason, while the observed accumulated covid-19 cases  $\Omega^{ob}$  presents upward concavity, we can conclude that  $R_{ef} > 1$ , and when presents downward concavity, then  $R_{ef} < 1$ . At  $R_{ef} = 1$ , we have the inflexion point (change from upward to downward concavity). In Figure 3 we show the daily and the accumulated severe covid-19 cases in São Paulo State (a) and Spain (b), where  $A$  indicates the time at which quarantine was introduced, and  $B$  represents the time at which inflexion point occurred. The partial quarantine in São Paulo State isolated approximately 53% of the population [6], while the rigid lockdown in Spain could have isolated 80% or more. In São Paulo State, a partial quarantine was introduced on March 24, and a rigid lockdown in Spain was introduced on March 16. Observing Figure 3, the inflexion point occurred approximately on June 10 in São Paulo, and on March 26 in Spain. The elapsed time between the implementation of quarantine ( $A$ ) and the inflexion point ( $B$ ) is 78 days in São Paulo State, and 10 days in Spain.

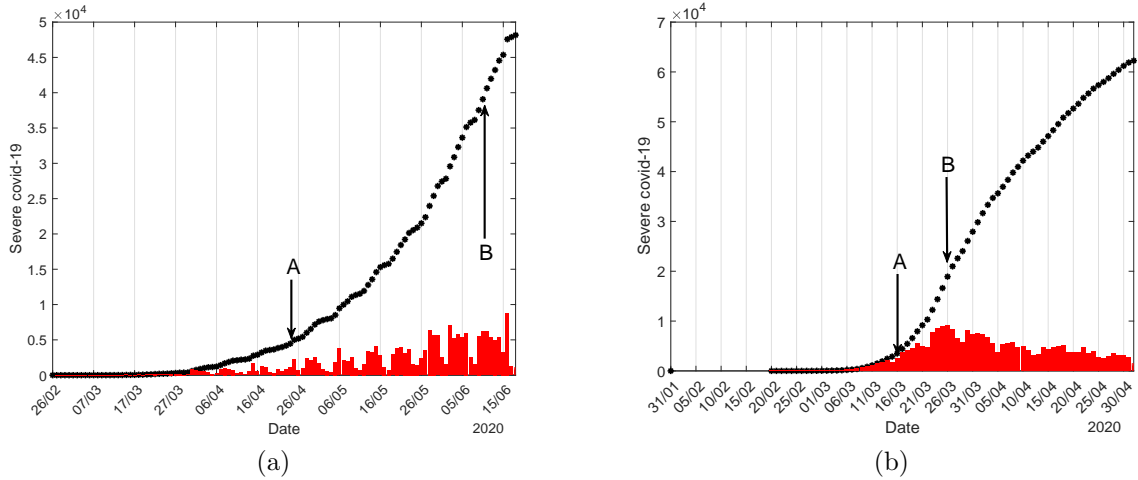

Figure 3: The daily (bars) and the accumulated (points) severe covid-19 cases in São Paulo State (a) and Spain (b), where  $A$  indicates the time at which quarantine was introduced, and  $B$  indicates the time at which the inflexion point occurred.

Let us define the threshold of the proportion in isolation in a population as  $q^{th} = 1 - 1/R_0$ . If the proportion in quarantine  $q$  is  $q > q^{th}$ , we must have  $R_{ef} < 1$  and the observed accumulated covid-19 cases must present downward concavity. Using the value of  $R_0$  estimated in the

foregoing section, for the SIR model ( $R_0$  estimated with  $I(0) = 1$ ) we have  $q^{th} = 0.68$  for São Paulo State, and  $q^{th} = 0.66$  for Spain. For the SEAPMDR model, we have  $q^{th} = 0.85$  for São Paulo State, and  $q^{th} = 0.83$  for Spain. Both models generically portrayed the observed data: São Paulo State has  $q < q^{th}$  (upward concavity), while Spain,  $q > q^{th}$  (downward concavity). Notice that the inflexion point occurred approximately 10 days after the implementation of lockdown in Spain, hence the proportion in isolation must be closer or higher than 83%.

However, if we consider  $R_0 = 2.11$  estimated from the SIR model (using  $I(0) = 25$ ), we obtain  $q^{th} = 0.53$  for São Paulo State, and we have  $q = q^{th}$ . In this case, the observed severe covid-19 cases must follow that observed in Spain just after the implementation of the partial quarantine, that is, downward concavity. Notwithstanding, the inflexion point occurred approximately 78 days later. It is expected that the higher the difference  $q^{th} - q$ , the more the inflexion point must be delayed. The long time to reach the inflexion point in São Paulo State (approximately 78 days) may be an indicator that  $R_0$  estimated by the SEAPMDR model seems to be more reliable than that estimated by the SIR model.

As we have pointed out, at the beginning and also in the early phase of the covid-19 epidemic, only hospitalized severe covid-19 cases were registered after the confirmation by serological and/or PCR tests. These individuals are either isolated in hospitals (receiving treatment) or discharged from hospitals but recommend to be isolated in their homes. Then, somehow, the majority of these individuals are not participating in the populational SARS-CoV-2 chain transmission.

In the SEAPMDR model, there are several infectious classes but the severe covid-19 cases do not transmit the SARS-CoV-2, for this reason,  $R_0$  does not depend on the additional mortality rates  $\alpha_y$  and  $\alpha_o$  (see equations (12) and (13)). On the other hand, in the SIR model, there is only one infectious class, and  $R_0$  depends on the additional mortality rate  $\alpha$  (see equation (A.2)). Notice that in the SIR model, the unique way to estimate the transmission rate is considering that severe covid-9 cases are forming the infective class  $I$ . Hence, the estimation of  $R_0$  provided by the SIR model using severe covid-19 cases may not be accurate.

We conclude that models taking into account important aspects related to the natural history of the infection must estimate more accurately  $R_0$ . For instance, the incorporation of the asymptomatic and pre-diseased individuals, mild covid-19 cases, different lethality according to age must improve the mathematical model to describe the covid-19 epidemic. Additionally, these more elaborated models could consider the severe covid-19 cases being isolated, and SARS-CoV-2 is transmitted by asymptomatic and pre-diseased individuals, for instance. However, the SIR model is structured in only one infectious compartment. For this reason, specifically in the case of the covid-19 epidemic when the severe covid-19 cases may not transmit SARS-

CoV-2 populationally, this model (and also the SEIR model) is not suitable to estimate the basic reproduction number  $R_0$ .

## Financial support

This research received no specific grant from any funding agency, commercial or not-for-profit sectors.

## Declaration of interest

Declarations of interest: None.

## References

- [1] Koo JR, *et al.* Interventions to mitigate early spread of SARS-CoV-2 in Singapore: A modelling study. *Lancet Infect Dis.* 2020; 20 (6): 678-688. doi 10.1016/S1473-3099(20)30162-6.
- [2] Ferguson NM, *et al.* Impact of non-pharmaceutical interventions (NPIs) to reduce covid-19 mortality and healthcare demand. Imperial College covid-19 Response Team 2020; March 16, 2020. doi: <https://doi.org/10.25561/77482>.
- [3] Anderson RM, May, RM. *Infectious Diseases of Human. Dynamics and Control.* Oxford, New York, Tokyo: Oxford University Press; 1991: 757 p.
- [4] Yang HM. Modeling directly transmitted infections in a routinely vaccinated population – The force of infection described by Volterra integral equation. *Applied Mathematics and Computation* 2001; 122 (1): 27-58.
- [5] Arons MM, *et al.* Presymptomatic SARS-CoV-2 infections and transmission in a skilled nursing facility. *The New Engl. Jour. Medicine* 2020; April 24, 2020. doi: 10.1056/NEJMoa2008457.
- [6] SEADE, SP contra o novo coronavírus – Boletim completo. Available from: [https://www.seade.gov.br/coronavirus/?utm\\_source=portal&utm\\_medium=banner&utm\\_campaign=completo](https://www.seade.gov.br/coronavirus/?utm_source=portal&utm_medium=banner&utm_campaign=completo), (accessed on August 14, 2020).

- [7] CNE, Covid19. Available from: <https://cneocovid.isciii.es/covid19/>. (Accessed on August 14, 2020).
- [8] Yang HM, Lombardi Junior LP, Castro FFM, Campos AC. Mathematical model describing covid-19 in São Paulo State, Brazil – Evaluating isolation as control mechanism and forecasting epidemiological scenarios of release. *Epidemiology and Infection* 2020 148: e155. doi: 10.1017/S0950268820001600.
- [9] Luo J. When will COVID-19 end? Data-driven prediction. Data-Driven Innovation Lab. 2020. Available from: <https://ddi.sutd.edu.sg/publications>. (Accessed on October 10, 2020).
- [10] Li RY, *et al.* Substantial undocumented infection facilitates the rapid dissemination of novel coronavirus (SARS-CoV2). *Science* 2020; 368(6490): 489-493. doi: 10.1126/science.abb3221.
- [11] Diekmann O, Heesterbeek JAP, Roberts MG. The construction of next-generation matrices for compartmental epidemic models. *J. R. Soc. Interface* 2010; 7: 873-885.
- [12] Yang HM. The basic reproduction number obtained from Jacobian and next generation matrices – A case study of dengue transmission modelling. *BioSystems* 2014; 126: 52-75.
- [13] Yang HM, Greenhalgh D. Proof of conjecture in: The basic reproduction number obtained from Jacobian and next generation matrices – A case study of dengue transmission modelling. *Appl. Math. Comput.* 2015; 265: 103-107.

## A The steady-state analysis of the SIR model

The system of equations (1) does not reach a steady-state, except if  $\phi = \mu + \alpha I/N$ . However, the system (1) in terms of fractions attains steady-state. Defining the fraction  $x = X/N$ , with  $X = \{S, I, R\}$ , we have

$$\frac{d X}{dt N} = \frac{1}{N} \frac{d}{dt} X - \frac{X}{N} \frac{1}{N} \frac{d}{dt} N = \frac{1}{N} \frac{d}{dt} X - x (\phi - \mu - \alpha i),$$

using equation (2), and the system of equations (1) becomes

$$\begin{cases} \frac{d}{dt}s &= \phi - \beta is - \phi s + \alpha is \\ \frac{d}{dt}i &= \beta is - (\gamma + \phi + \alpha) i + \alpha i^2 \\ \frac{d}{dt}r &= \gamma i - \phi r + \alpha ir, \end{cases} \quad (\text{A.1})$$

with  $s + i + r = 1$ , hence, the equation for  $r$  can be decoupled from the system, through  $r = 1 - s - i$ . Notice that  $d(s + i + r)/dt = 0$ , and the system of equations in terms of fractions attain a steady state.

The system of equations (A.1), dropping out the decoupled equation for  $r$ , has two equilibrium points: The trivial (disease-free) equilibrium point  $P^0 = (\bar{s} = 1, \bar{i} = 0)$  and non-trivial (epidemic) equilibrium point  $P^* = (\bar{s} = s^*, \bar{i} = i^*)$ .

The Jacobian matrix  $J$  evaluated at the trivial equilibrium point  $P^0 = (\bar{s} = 1, \bar{i} = 0)$  is

$$J = \begin{bmatrix} -\phi & -\beta + \alpha \\ 0 & \beta - (\gamma + \phi + \alpha) \end{bmatrix},$$

with eigenvalues  $\rho_1 = -\phi$  and  $\rho_2 = (\gamma + \phi + \alpha)(R_0 - 1)$ , where the basic reproduction number  $R_0$  is given by

$$R_0 = \frac{\beta}{\gamma + \phi + \alpha}. \quad (\text{A.2})$$

Hence,  $P^0$  is locally asymptotically stable if  $R_0 < 1$ .

The non-trivial equilibrium point  $P^* = (\bar{s} = s^*, \bar{i} = i^*)$  has the coordinates given by

$$\begin{cases} s^* = \frac{\phi}{(\beta - \alpha)i^* + \phi} \\ P_2(i) = 0, \end{cases} \quad (\text{A.3})$$

where  $i^*$  is the positive root but small than one of the second degree polynomial  $P_2(i)$  given by

$$P_2(i) = \frac{\alpha}{\phi} \left[ (R_0 - 1) + \frac{\gamma + \phi}{\gamma + \phi + \alpha} \right] i^2 - \left[ \frac{\gamma + \phi + \alpha}{\phi} (R_0 - 1) + \frac{(\gamma + \phi)^2 + \gamma\alpha}{\phi(\gamma + \phi + \alpha)} \right] i + (R_0 - 1), \quad (\text{A.4})$$

which has the value, at  $i = 1$ ,

$$P_2(1) = - \left[ \frac{\gamma}{\phi} (R_0 - 1) + \frac{\gamma(\gamma + \phi) + \phi(\gamma + \phi - \alpha)}{\phi(\gamma + \phi + \alpha)} \right].$$

When  $R_0 > 1$ , we have  $P_2(1) < 0$  (the condition  $\gamma + \phi > \alpha$  is satisfied once  $\gamma > \alpha$ ), and the



two positive roots of  $P_2(i)$  are such that  $0 < i_1^* < 1 < i_2^*$ . Hence the small root  $i_1^*$  is biologically feasible. When  $R_0 = 1$ , we have  $i_1^* = 0$  and  $i_2^* > 1$ , hence  $i_1^* = 0$  is biologically feasible. When  $R_0 < 1$ , we have  $i_1^* < 0$  and  $i_2^* > 1$ , hence  $i_1^* = 0$  is biologically feasible. Therefore, the small root  $i_1^*$ , which is biologically feasible, assumes a negative value for  $R_0 < 1$ , zero at  $R_0 = 1$ , and positive value but lower than 1 for  $R_0 > 1$ . The small root of  $P_2(i)$  is given by

$$i_1^* = \frac{\left[ \frac{\gamma + \phi + \alpha}{\phi} (R_0 - 1) + \frac{(\gamma + \phi)^2 + \gamma\alpha}{\phi(\gamma + \phi + \alpha)} \right] - \sqrt{\Delta}}{2 \frac{\alpha}{\phi} \left[ (R_0 - 1) + \frac{\gamma + \phi}{\gamma + \phi + \alpha} \right]}, \quad (\text{A.5})$$

where  $\Delta$  is

$$\Delta = \left[ \frac{\gamma + \phi + \alpha}{\phi} (R_0 - 1) + \frac{(\gamma + \phi)^2 + \gamma\alpha}{\phi(\gamma + \phi + \alpha)} \right]^2 - 4 \frac{\alpha}{\phi} \left[ (R_0 - 1) + \frac{\gamma + \phi}{\gamma + \phi + \alpha} \right] (R_0 - 1).$$

The complexity arises due to the non-constant population under the additional mortality rate. Let us consider  $\alpha = 0$ . In this case,  $P_2(i)$  has a unique positive solution

$$i^* = \frac{\phi (R_0 - 1)}{(\gamma + \phi) R_0}, \quad (\text{A.6})$$

and the fraction of susceptible individuals, from equation (A.3), is

$$s^* = \frac{1}{R_0}. \quad (\text{A.7})$$

When  $\alpha > 0$ , comparing equations (A.3) and (A.5), we notice that  $s^*$  has a complex dependency with  $R_0$ , not simply  $1/R_0$ .

## B The steady-state analysis of the SEAPMDR model

The system of equations (7), (8) and (9) does not reach steady state, except if  $\phi = \mu + (\alpha_y D_y + \alpha_o D_o)/N$ , when the total size of the population is constant. However, the system of equations (7), (8) and (9) in term of fractions attains steady-state. Defining the fraction  $x_j = X_j/N$ , for  $j = y, o$ , with  $X_j = \{S_j, E_j, A_j, P_j, M_j, D_j, R\}$ , we have

$$\frac{d}{dt} \frac{X_j}{N} = \frac{1}{N} \frac{d}{dt} X_j - \frac{X_j}{N} \frac{1}{N} \frac{d}{dt} N = \frac{1}{N} \frac{d}{dt} X_j - x_j (\phi - \mu - \alpha_y d_y - \alpha_o d_o),$$

using equation (10), and the system of equations (7), (8) and (9) in terms of fractions become, for susceptible and isolated persons,

$$\begin{cases} \frac{d}{dt}s_y &= \phi - (\varphi + \phi)s_y - \lambda s_y + s_y(\alpha_y d_y + \alpha_o d_o) \\ \frac{d}{dt}s_o &= \varphi s_y - \phi s_o - \lambda \psi s_o + s_o(\alpha_y d_y + \alpha_o d_o), \end{cases} \quad (\text{B.1})$$

for infected persons,

$$\begin{cases} \frac{d}{dt}e_j &= \lambda(\delta_{jy} + \psi\delta_{jo})s_j - (\sigma_j + \phi)e_j + e_j(\alpha_y d_y + \alpha_o d_o) \\ \frac{d}{dt}a_j &= l_j\sigma_j e_j - (\gamma_j + \phi)a_j + a_j(\alpha_y d_y + \alpha_o d_o) \\ \frac{d}{dt}p_j &= (1 - l_j)\sigma_j e_j - (\gamma_{1j} + \phi)p_j + p_j(\alpha_y d_y + \alpha_o d_o) \\ \frac{d}{dt}m_j &= (1 - \chi_j)\gamma_j a_j + k_j\gamma_{1j}p_j - (\gamma_{3j} + \phi)m_j + m_j(\alpha_y d_y + \alpha_o d_o) \\ \frac{d}{dt}d_j &= (1 - k_j)\gamma_{1j}p_j - (\gamma_{2j} + \phi + \alpha_j)d_j + d_j(\alpha_y d_y + \alpha_o d_o), \end{cases} \quad (\text{B.2})$$

and for immune persons

$$\frac{d}{dt}R = \chi_y\gamma_y A_y + \gamma_{3y}M_y + \gamma_{2y}D_y + \chi_o\gamma_o A_o + \gamma_{3o}M_o + \gamma_{2o}D_o - \mu R,$$

,

$$\frac{d}{dt}r = \chi_y\gamma_y a_y + \gamma_{3y}m_y + \gamma_{2y}d_y + \chi_o\gamma_o a_o + \gamma_{3o}m_o + \gamma_{2o}d_o - \phi r + r(\alpha_y d_y + \alpha_o d_o), \quad (\text{B.3})$$

where  $\lambda$  is the force of infection given by equation (6) re-written as

$$\lambda = \frac{\varepsilon}{\omega} (\beta_{1y}a_y + \beta_{2y}p_y + \beta_{3y}z_y m_y + \beta_{1o}a_o + \beta_{2o}p_o + \beta_{3o}z_o m_o),$$

and

$$\sum_{j=y,o} (s_j + e_j + a_j + p_j + m_j + d_j) + r = 1.$$

This new system of equation has steady-state, that is, the number of persons in all classes varies with time, however, their fractions attain steady-state (the sum of derivatives of all classes is zero).

The trivial (disease-free) equilibrium point  $P^0$  of the new system of equations (B.1), (B.2)

and (B.3) is given by

$$P^0 = (s_j^0, e_j^0 = 0, a_j^0 = 0, p_j^0 = 0, m_j^0 = 0, d_j^0 = 0, r^0 = 0),$$

for  $j = y$  and  $o$ , where

$$\begin{cases} s_y^0 = \frac{\phi}{\phi + \varphi} \\ s_o^0 = \frac{\varphi}{\phi + \varphi}, \end{cases} \quad (\text{B.4})$$

with  $s_y^0 + s_o^0 = 1$ .

Let us assess the stability of  $P^0$  by applying the next generation matrix theory considering the vector of variables  $x = (e_y, a_y, p_y, m_y, e_o, a_o, p_o, m_o)$  [11]. We apply method proposed in [12] and proved in [13]. To obtain the basic reproduction number, diagonal matrix  $V$  is considered. Hence, the vectors  $f$  and  $v$  are

$$f^T = \begin{pmatrix} \lambda s_y + e_y (\alpha_y d_y + \alpha_o d_o) \\ l_y \sigma_y e_y + a_y (\alpha_y d_y + \alpha_o d_o) \\ (1 - l_y) \sigma_y e_y + p_y (\alpha_y d_y + \alpha_o d_o) \\ (1 - \chi_y) \gamma_y a_y + k_y \gamma_{1y} p_y + m_y (\alpha_y d_y + \alpha_o d_o) \\ \lambda \psi s_o + e_o (\alpha_y d_y + \alpha_o d_o) \\ p_o \sigma_o e_o + a_o (\alpha_y d_y + \alpha_o d_o) \\ (1 - p_o) \sigma_o e_o + p_o (\alpha_y d_y + \alpha_o d_o) \\ (1 - \chi_o) \gamma_o a_o + k_o \gamma_{1o} p_o + m_o (\alpha_y d_y + \alpha_o d_o) \end{pmatrix} \quad (\text{B.5})$$

and

$$v^T = \begin{pmatrix} (\sigma_y + \phi) e_y \\ (\gamma_y + \phi) a_y \\ (\gamma_{1y} + \phi) p_y \\ (\gamma_{3y} + \phi) m_y \\ (\sigma_o + \phi) e_o \\ (\gamma_o + \phi) a_o \\ (\gamma_{1o} + \phi) p_o \\ (\gamma_{3o} + \phi) m_o \end{pmatrix}, \quad (\text{B.6})$$

where the superscript  $T$  stands for the transposition of a matrix, from which we obtain the matrices  $F$  and  $V$  (see [11]) evaluated at the trivial equilibrium  $P^0$ , which were omitted. The

next generation matrix  $FV^{-1}$  is

$$FV^{-1} = \begin{bmatrix} 0 & \frac{\beta_{1y}s_y^0}{\gamma_y+\phi} & \frac{\beta_{2y}s_y^0}{\gamma_{1y}+\phi} & \frac{\beta_{3y}z_y s_y^0}{\gamma_{3y}+\phi} & 0 & \frac{\beta_{1o}s_y^0}{\gamma_o+\phi} & \frac{\beta_{2o}s_y^0}{\gamma_{1o}+\phi} & \frac{\beta_{3o}z_o s_y^0}{\gamma_{3o}+\phi} \\ \frac{l_y\sigma_y}{\sigma_y+\phi} & 0 & 0 & 0 & 0 & 0 & 0 & 0 \\ \frac{(1-l_y)\sigma_y}{\sigma_y+\phi} & 0 & 0 & 0 & 0 & 0 & 0 & 0 \\ 0 & \frac{(1-\chi_y)\gamma_y}{\gamma_y+\phi} & \frac{k_y\gamma_{1y}}{\gamma_{1y}+\phi} & 0 & 0 & 0 & 0 & 0 \\ 0 & \frac{\beta_{1y}\psi s_o^0}{\gamma_y+\phi} & \frac{\beta_{2y}\psi s_o^0}{\gamma_{1y}+\phi} & \frac{\beta_{3y}z_y\psi s_o^0}{\gamma_{3y}+\phi} & 0 & \frac{\beta_{1o}\psi s_o^0}{\gamma_o+\phi} & \frac{\beta_{2o}\psi s_o^0}{\gamma_{1o}+\phi} & \frac{\beta_{3o}z_o\psi s_o^0}{\gamma_{3o}+\phi} \\ 0 & 0 & 0 & 0 & \frac{p_o\sigma_o}{\sigma_o+\phi} & 0 & 0 & 0 \\ 0 & 0 & 0 & 0 & \frac{(1-p_o)\sigma_o}{\sigma_o+\phi} & 0 & 0 & 0 \\ 0 & 0 & 0 & 0 & 0 & \frac{(1-\chi_o)\gamma_o}{\gamma_o+\phi} & \frac{k_o\gamma_{1o}}{\gamma_{1o}+\phi} & 0 \end{bmatrix}$$

and the characteristic equation corresponding to  $FV^{-1}$  is

$$\varkappa^3 \left[ \varkappa^3 - \frac{\varepsilon}{\omega} (R_{1y}s_y^0 + R_{1o}s_o^0) \varkappa - \frac{\varepsilon}{\omega} (R_{2y}s_y^0 + R_{2o}s_o^0) \right] = 0, \quad (\text{B.7})$$

with the basic reproduction number  $R_0$  being given by

$$R_0 = (R_{1y} + R_{2y}) s_y^0 + (R_{1o} + R_{2o}) s_o^0, \quad (\text{B.8})$$

where the initial fractions  $s_y^0$  and  $s_o^0$  are given by equation (B.4), and the partial basic reproduction numbers  $R_{1y}$ ,  $R_{2y}$ ,  $R_{1o}$ , and  $R_{2o}$  are given by equation (13) in the main text. The spectral radius  $\rho(FV^{-1})$  is the biggest solution of a third degree polynomial, which is not easy to evaluate. The procedure proposed in [12] allows us to obtain the threshold  $R_0$  as the sum of coefficients of the characteristic equation, where  $R_0$  is the basic reproduction number given by equation (12) in the main text. Hence, the trivial equilibrium point  $P^0$  is locally asymptotically stable if  $R_0 < 1$ .

## C The SEIR model

Including the exposed class  $E$  in the SIR model, we have the SEIR model

$$\begin{cases} \frac{d}{dt}S &= \phi N - \beta \frac{I}{N}S - \mu S \\ \frac{d}{dt}E &= \beta \frac{I}{N}S - (\sigma + \mu) E \\ \frac{d}{dt}I &= \sigma E - (\gamma + \mu + \alpha) I \\ \frac{d}{dt}R &= \gamma I - \mu R, \end{cases} \quad (\text{C.1})$$

where  $\sigma$  is the incubation rate. As the previous analysis for the SIR model, we can obtain the basic reproduction number  $R_0$ , which is given by

$$R_0 = \frac{\sigma}{\sigma + \mu} \times \frac{\beta}{\gamma + \mu + \alpha}, \quad (\text{C.2})$$

when  $\phi = \mu$ , and the accumulated cases  $\Omega$  obeys

$$\frac{d}{dt}\Omega = \sigma E, \quad \text{with } \Omega(0) = 0.$$

To estimate  $R_0$  for the SEAPMDR model in the main text, we used as the initial conditions  $E(0) = 50$  and  $I(0) = 1$  among others. For the SEIR model, let us consider as the initial conditions  $E(0) = 50$  and  $I(0) = 1$ , but  $S(0)$  and  $R(0)$  are the same supplied to the SIR model. We let  $\sigma = 1/5 \text{ days}^{-1}$  (as in the SEAPMDR model), and the values for other parameters are those provided in the SIR model. The value  $\gamma = 1/10 \text{ days}^{-1}$  is somehow considered an average value among  $\gamma, \gamma_1, \gamma_2$  and  $\gamma_3$  in the SEAPMDR model. The estimated basic reproduction number for São Paulo State was  $R_0 = 3.53$  with Sum =  $1.56 \times 10^6$ , and for Spain,  $R_0 = 4.07$  with Sum =  $2.53 \times 10^8$ .

Notice that  $\sigma/(\sigma + \mu) = 0.99999$ , hence,  $R_0$  given by equations (A.2) and (C.2) must be equal if  $\beta$  is the same for the SIR and SEIR models. However,  $\beta$  is estimated by the dynamical systems (1) or (C.1) against the accumulated severe covid-19 cases. For this reason, the estimated  $\beta$  must be different between SIR and SEIR models. Let us consider SEIR model considering the initial conditions  $S(0) = N_0, E(0) = 0, R(0) = 0$ , and varying  $I(0)$ .

For the data collected from São Paulo State, with  $S(0) = 44.6$  million, we obtained for  $I(0) = 1, R_0 = 7.25$  with Sum =  $1.36 \times 10^6$ , for  $I(0) = 10, R_0 = 4.7$  with Sum =  $4.52 \times 10^5$ , for  $I(0) = 25, R_0 = 3.82$  with Sum =  $1 \times 10^6$ , and for  $I(0) = 100, R_0 = 2.6$  with Sum =  $3.68 \times 10^6$ . The lowest Sum occurs when  $R_0 = 4.7$ .

For the data collected from Spain, with  $S(0) = 47.4$  million, we obtained for  $I(0) = 1,$

$R_0 = 6.27$  with  $\text{Sum} = 2.39 \times 10^8$ , for  $I(0) = 10$ ,  $R_0 = 4.75$  with  $\text{Sum} = 7.64 \times 10^7$ , for  $I(0) = 25$ ,  $R_0 = 4.21$  with  $\text{Sum} = 2.21 \times 10^8$ , and for  $I(0) = 100$ ,  $R_0 = 3.38$  with  $\text{Sum} = 7.57 \times 10^8$ . The lowest Sum occurs when  $R_0 = 4.75$ .

Figure C.1 shows the estimated curve  $\Omega$  for São Paulo (a) and Spain (b) with three different initial conditions ( $I(0) = 1, 10$ , and  $25$ ).

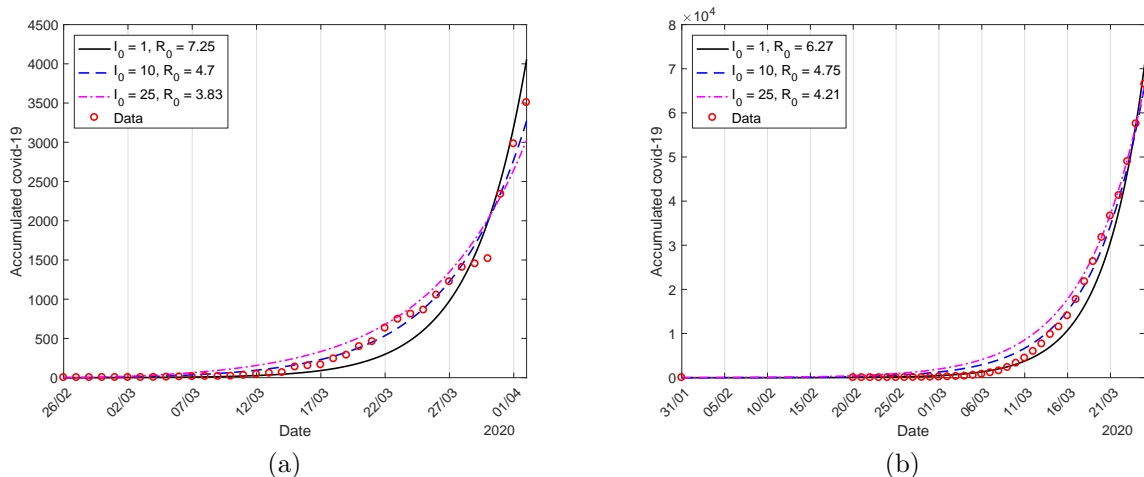

Figure C.1: The estimated curve  $\Omega$  for São Paulo (a) and Spain (b) with three different initial conditions  $I(0) = 1$  (continuous curve),  $10$  (dashed curve), and  $25$  (dashed and dotted curve).

Comparing with the estimated  $R_0$  provided by the SIR model (see the main text), we observe that the SEIR model estimated with a higher value. Let us assess the role played by the incubation period  $\sigma^{-1}$  in the SEIR model considering the initial conditions  $S(0) = N_0$ ,  $E(0) = 0$ ,  $I(0) = 1$  and  $R(0) = 0$ . For  $\sigma^{-1} = 10$  days,  $R_0 = 11.27$  with  $\text{Sum} = 1.15 \times 10^6$ , for  $\sigma^{-1} = 1$  day,  $R_0 = 3.92$  with  $\text{Sum} = 8.92 \times 10^5$ , for  $\sigma^{-1} = 10^{-1}$  days (2.4 hours),  $R_0 = 3.2$  with  $\text{Sum} = 8.06 \times 10^5$ , and for  $\sigma^{-1} = 10^{-3}$  days (1.44 minutes),  $R_0 = 3.14$  with  $\text{Sum} = 7.96 \times 10^5$ . As  $\sigma^{-1}$  decreases,  $R_0$  approaches to that estimated by the SIR model ( $R_0 = 3.14$  for  $\sigma^{-1} = 5$  days).

The SIR model, by disregarding the incubation period, provides a relatively lower estimation for  $R_0$  in comparison with the SEIR model. Suppose that the incubation period of SARS-CoV-2 is very long, for instance, 10 years. To overcome this long period and fit the same set of the severe covid-19 cases, the transmission rate of SARS-CoV-2 must be much higher in the SEIR than the SIR model. Therefore, the inclusion of the exposed individuals delays the onset of disease (or the entering into an infectious compartment), and the virus must infect more individuals (increased  $R_0$ ).
